# Supplementary material for: Future Changes in Hydro-Climatic Extremes across Vietnam: Evidence from a Semi-Distributed Hydrological Model Forced by Downscaled CMIP6 Climate Data
Source: MDPI journal article supplement (doi:10.3390/w16050674), 2024-02-25
Supplement: s1 [file s1]

## Article

# Future changes in hydro-climatic extremes across Vietnam: Evidence from a semi-distributed hydrological model forced by downscaled CMIP6 climate data

Hong Xuan Do<sup>1,2,\*</sup>, Tu Hoang Le<sup>3</sup>, Manh-Hung Le<sup>4,5</sup>, Dat Le Tan Nguyen<sup>6</sup> and Nhu Cuong Do<sup>7</sup>

<sup>1</sup> Faculty of Environment and Natural Resources, Nong Lam University - Ho Chi Minh City, Ho Chi Minh City, Vietnam; doxuanhong@hcmuaf.edu.vn

<sup>2</sup> Center for Technology Business Incubation, Nong Lam University – Ho Chi Minh City, Ho Chi Minh City, Vietnam

<sup>3</sup> Research Center for Climate Change, Nong Lam University – Ho Chi Minh City, Ho Chi Minh City, Vietnam; tu.lehoang@hcmuaf.edu.vn

<sup>4</sup> Hydrological Sciences Laboratory, NASA Goddard Space Flight Center, Greenbelt, MD, USA; [manh-hung.le@nasa.gov](mailto:manh-hung.le@nasa.gov)

<sup>5</sup> Science Applications International Corporation, Greenbelt, MD, USA

<sup>6</sup> Faculty of Management Sciences, Thu Dau Mot University, Binh Duong Province, Vietnam; datnlt@tdmu.edu.vn

<sup>7</sup> School of Civil, Environmental and Mining Engineering, University of Adelaide, Adelaide, SA 5005, Australia; nhu.do@adelaide.edu.au

\* Correspondence: doxuanhong@hcmuaf.edu.vn

## Supplementary Materials

**Table S1.** SWAT model's parameters and calibrated ranges. The "Sensitivity significance" field provides the sensitivity analysis results; an asterisk indicates that the parameter is sensitive (i.e., the *p*-value is smaller than 0.05) for the corresponding catchment.

| Seq. | Parameter | Description                                                                            | Calibration method | Calibrated range | Sensitivity significance |     |     |     |     |     |     |
|------|-----------|----------------------------------------------------------------------------------------|--------------------|------------------|--------------------------|-----|-----|-----|-----|-----|-----|
|      |           |                                                                                        |                    |                  | CHU                      | XLA | NKH | SDI | AHO | GSO | CDA |
| 1    | CN2       | SCS runoff curve number                                                                | Relative           | -0.25 - 0.25     | *                        | *   | *   | *   | *   | *   | *   |
| 2    | ALPHA_BF  | Baseflow alpha factor (days)                                                           | Replace            | 0 - 1            | -                        | -   | -   | -   | -   | -   | -   |
| 3    | GW_DELAY  | Groundwater delay                                                                      | Replace            | 0 - 500          | -                        | -   | -   | -   | -   | -   | -   |
| 4    | GWQMN     | Threshold depth of water in the shallow aquifer required for return flow to occur (mm) | Replace            | 0 - 5000         | -                        | -   | -   | -   | -   | -   | -   |
|      |           |                                                                                        |                    |                  |                          |     |     |     |     |     |     |
| 5    | RCHRG_DP  | Deep aquifer percolation fraction                                                      | Relative           | 0 - 1            | -                        | -   | *   | *   | -   | -   | -   |
| 6    | GW_REVAP  | Groundwater "revap" coefficient                                                        | Relative           | 0.02 - 2         | -                        | -   | -   | -   | -   | -   | -   |
| 7    | SURLAG    | Surface runoff lag time                                                                | Replace            | 0.05 - 24        | -                        | -   | -   | -   | -   | -   | -   |
| 8    | LAT_TTIME | Lateral flow travel time                                                               | Replace            | 0 - 180          | -                        | -   | -   | -   | -   | -   | -   |
| 9    | OV_N      | Manning's "n" value for overland flow                                                  | Replace            | 0.01 - 1         | *                        | -   | -   | *   | -   | *   | *   |
| 10   | ESCO      | Soil evaporation compensation factor                                                   | Relative           | 0 - 1            | *                        | *   | -   | -   | -   | *   | *   |
| 11   | EPCO      | Plant uptake compensation factor                                                       | Replace            | 0 - 1            | -                        | -   | -   | -   | -   | -   | -   |
| 12   | SLSUBBSN  | Average slope length                                                                   | Replace            | -0.25 - 0.25     | -                        | -   | -   | -   | *   | -   | -   |
| 13   | HRU_SLP   | Average slope steepness                                                                | Replace            | -0.25 - 0.25     | -                        | -   | -   | -   | -   | -   | -   |
| 14   | CH_N2     | Manning's "n" value for the main channel                                               | Relative           | 0 - 0.3          | *                        | *   | *   | -   | -   | *   | *   |
|      |           |                                                                                        |                    |                  |                          |     |     |     |     |     |     |
| 15   | CH_K2     | Effective hydraulic conductivity in main channel alluvium                              | Relative           | 0 - 500          | *                        | *   | *   | *   | *   | *   | *   |
| 16   | ALPHA_BNK | Baseflow alpha factor for bank storage                                                 | Replace            | 0 - 1            | *                        | *   | *   | *   | *   | *   | *   |
| 17   | SOL_AWC   | Available water capacity of the soil layer                                             | Replace            | -0.5 - 0.5       | *                        | *   | -   | -   | -   | *   | *   |
|      |           |                                                                                        |                    |                  |                          |     |     |     |     |     |     |
| 18   | SOL_BD    | Moist bulk density                                                                     | Replace            | -0.25 - 0.25     | *                        | -   | -   | -   | -   | -   | -   |

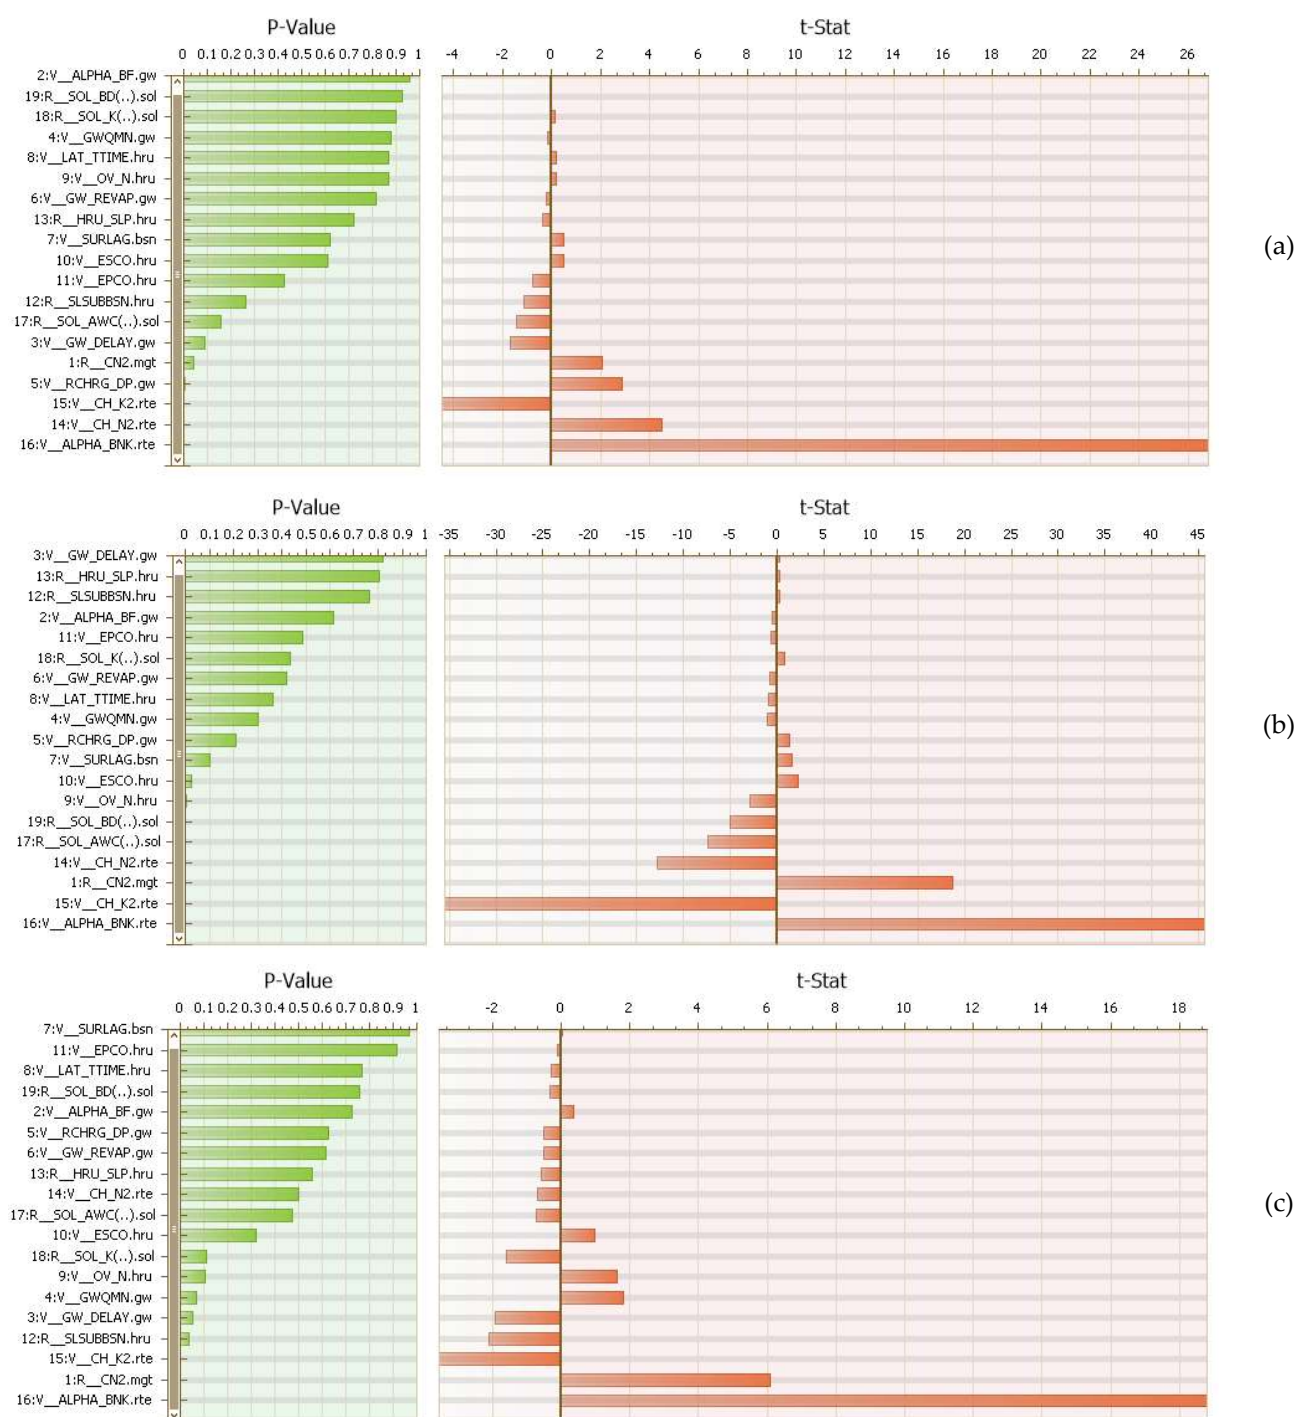

**Figure S1.** The results of the sensitivity analysis of (a) NKH, (b) CHU, and (c) AHO catchments. Parameters with low  $p$ -value and high  $t$ -statistic are the most sensitive ones.

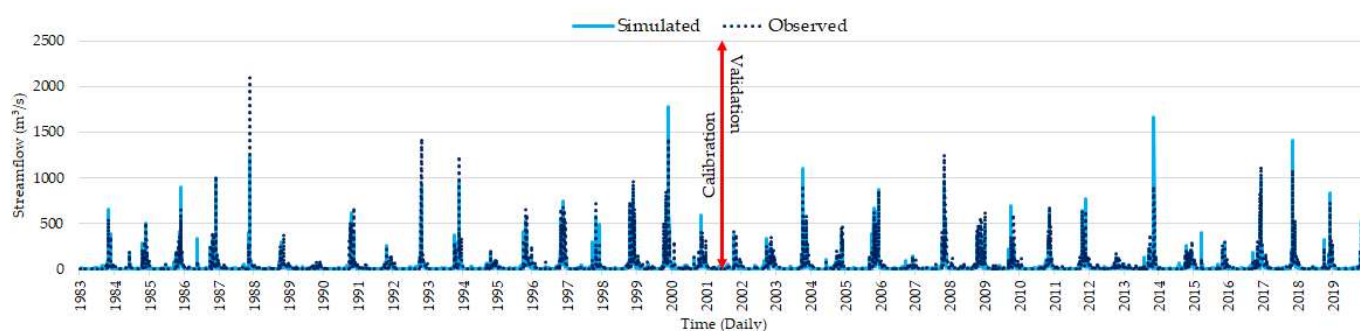

**Figure S2.** Simulated and observed streamflow of AHO over the calibration and validation period.

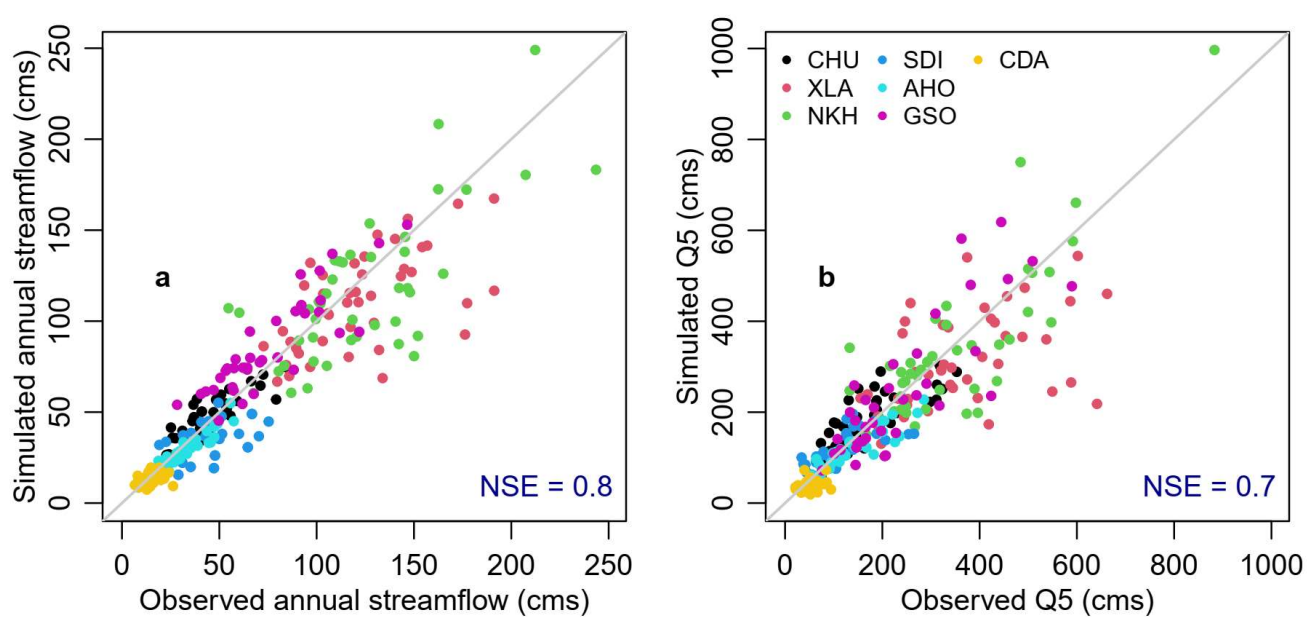

**Figure S3.** Scatterplots between simulated and observed values across all assessed catchments for (a) annual streamflow (yearly average) and (b) Q5 index. Note that the NSE values were calculated for all data points from seven catchments.
